# Supplementary figures and images for: Lithium rescues toxicity of aggregate-prone proteins in Drosophila by perturbing Wnt pathway
Source: Oxford University Press journal article supplement (doi:10.1093/hmg/ddi331), 2005-09-02

# Supplementary Figure 1

a

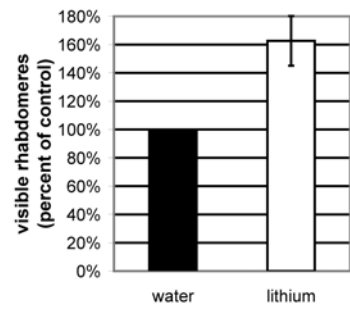

b

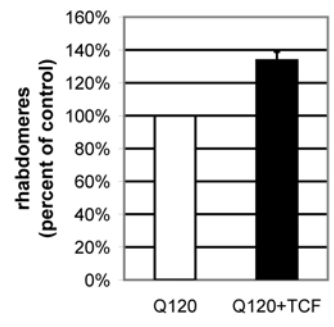

c

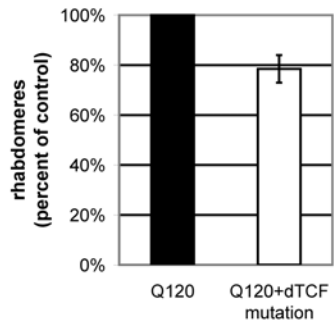

d

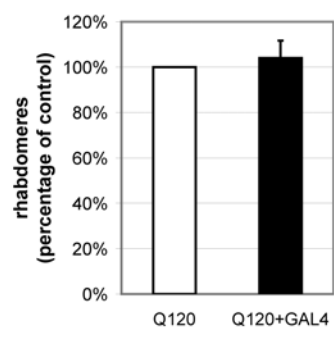

e

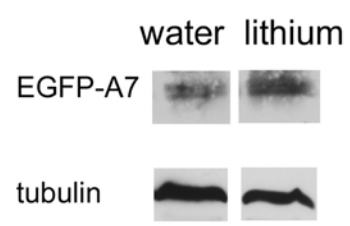

Supplement: ddi331_Supplementary_Data.zip [file ddi331_Supplementary_Data.zip]
